# Supplementary material
Source: publisher figshare collection journal article supplement (https://gsapubs.figshare.com/ndownloader/files/22411782)
Supplement: Supplementary file 1 [file 22411782]

Archive with 6 entries (6 files):
- RSFit3000 User Guide.pdf
- RSFit_txtwrite.m
- RSFit_xlswrite.m
- RSFit3000.fig
- RSFit3000.m
- RSFitLogo_small.jpg
