# Supplementary material
Source: publisher figshare collection journal article supplement (https://gsapubs.figshare.com/ndownloader/files/22411782)
Supplement: Supplementary file 1 [file 22411782 › RSFit_txtwrite.m]

function RSFit_txtwrite(FileName,varargin)
fileID = fopen(FileName, 'a+');
fprintf(fileID, '%2s\t %2s\t %2s\t %2s\t %2s\t %2s\t %2s\t %2s\t %2s\t %2s\t %2s\t %2s\t %2s\t %2s\t %2s\t %2s\t %2s\t %2s\t %2s\t %2s\t %2s\t %2s\t %2s\n',...
'Event', 'Event Time (s)', 'Event Displacement (1e-6 m/s)', 'v_i (1e-6 m/s)', 'v_f (1e-6 m/s)', 'Hold Duration (s)', 'mu_0', '2SD', 'a',...
    '2SD', 'b_1', '2SD', 'b_2', '2SD', 'a - b', '2SD', 'd_c1 (1e-6 m)', '2SD',...
    'd_c2 (1e-6 m)', '2SD', 'stiffness (1/ 1e-6 m)', '2SD', 'R-squared');

N = numel(varargin);
Row = 1;
for i = 1:N
    FieldNames  = fieldnames(varargin{1,i});
    if strcmp(FieldNames{8}, 'VelocityStepParameters')
        HD = '-';
        v_i = round(varargin{1,i}.VelocityStepParameters.InitialVelocity);
        v_f = round(varargin{1,i}.VelocityStepParameters.FinalVelocity);
        formatSpec = '%2s\t %2.2f\t %2.2f\t %2u\t %2u\t %2s\t %2.2f\t %2.2E\t %2.2E\t %2.2E\t %2.2E\t %2.2E\t %2.2E\t %2.2E\t %2.2E\t %2.2E\t %2.2E\t %2.2E\t %2.2E\t %2.2E\t %2.2E\t %2.2E\t %2.2f\n';
    else
        HD = varargin{1,i}.HoldParameters.HoldDuration;
        v_i = round(varargin{1,i}.HoldParameters.LoadVelocity);
        v_f = round(varargin{1,i}.HoldParameters.ReloadVelocity);
        formatSpec = '%2s\t %2.2f\t %2.2f\t %2u\t %2u\t %2u\t %2.2f\t %2.2E\t %2.2E\t %2.2E\t %2.2E\t %2.2E\t %2.2E\t %2.2E\t %2.2E\t %2.2E\t %2.2E\t %2.2E\t %2.2E\t %2.2E\t %2.2E\t %2.2E\t %2.2f\n';
    end
    if isempty(varargin{1,i}.AgingLawParameters) == 0
        EventName = [inputname(i + 1), ' - Aging Law'];
        Row = Row + 1;
        DataString = {EventName, varargin{1,i}.TimeData(1,1), varargin{1,i}.LoadPointDisplacementData(1,1),...
            v_i, v_f, HD, varargin{1,i}.AgingLawParameters.mu_0(1,1), varargin{1,i}.AgingLawParameters.mu_0(1,2),...
            varargin{1,i}.AgingLawParameters.a(1,1), varargin{1,i}.AgingLawParameters.a(1,2),...
            varargin{1,i}.AgingLawParameters.b1(1,1), varargin{1,i}.AgingLawParameters.b1(1,2),...
            varargin{1,i}.AgingLawParameters.b2(1,1), varargin{1,i}.AgingLawParameters.b2(1,2),...
            varargin{1,i}.AgingLawParameters.aminusb(1,1), varargin{1,i}.AgingLawParameters.aminusb(1,2),...
            varargin{1,i}.AgingLawParameters.d_c1(1,1), varargin{1,i}.AgingLawParameters.d_c1(1,2),...
            varargin{1,i}.AgingLawParameters.d_c2(1,1), varargin{1,i}.AgingLawParameters.d_c2(1,2),...
            varargin{1,i}.AgingLawParameters.stiffness(1,1), varargin{1,i}.AgingLawParameters.stiffness(1,2),...
            varargin{1,i}.AgingLawParameters.R_Squared};
        fprintf(fileID, formatSpec, DataString{1}, cell2mat(DataString(2:5)), DataString{6}, cell2mat(DataString(7:end)));
    end    
    if isempty(varargin{1,i}.SlipLawParameters) == 0
        EventName = [inputname(i + 1), ' - Slip Law'];
        Row = Row + 1;
        DataString = {EventName, varargin{1,i}.TimeData(1,1), varargin{1,i}.LoadPointDisplacementData(1,1),...
            v_i, v_f, HD, varargin{1,i}.SlipLawParameters.mu_0(1,1), varargin{1,i}.SlipLawParameters.mu_0(1,2),...
            varargin{1,i}.SlipLawParameters.a(1,1), varargin{1,i}.SlipLawParameters.a(1,2),...
            varargin{1,i}.SlipLawParameters.b1(1,1), varargin{1,i}.SlipLawParameters.b1(1,2),...
            varargin{1,i}.SlipLawParameters.b2(1,1), varargin{1,i}.SlipLawParameters.b2(1,2),...
            varargin{1,i}.SlipLawParameters.aminusb(1,1), varargin{1,i}.SlipLawParameters.aminusb(1,2),...
            varargin{1,i}.SlipLawParameters.d_c1(1,1), varargin{1,i}.SlipLawParameters.d_c1(1,2),...
            varargin{1,i}.SlipLawParameters.d_c2(1,1), varargin{1,i}.SlipLawParameters.d_c2(1,2),...
            varargin{1,i}.SlipLawParameters.stiffness(1,1), varargin{1,i}.SlipLawParameters.stiffness(1,2),...
            varargin{1,i}.SlipLawParameters.R_Squared};
        fprintf(fileID, formatSpec, DataString{1}, cell2mat(DataString(2:5)), DataString{6}, cell2mat(DataString(7:end)));
    end
end
fclose(fileID);
