# Supplementary material
Source: publisher figshare collection journal article supplement (https://gsapubs.figshare.com/ndownloader/files/22411782)
Supplement: Supplementary file 1 [file 22411782 › RSFit_xlswrite.m]

function RSFit_xlswrite(FileName,varargin)
Header = {'Event', 'Event Time (s)', ['Event Displacement (',char(956),'m)'],...
    ['v_i (',char(956),'m/s)'], ['v_f (',char(956),'m/s)'], 'Hold Duration (s)',...
    [char(956),'_0'], '2SD', 'a', '2SD', 'b_1', '2SD', 'b_2', '2SD', 'a - b',...
    '2SD', ['d_c1 (',char(956),'m)'], '2SD', ['d_c2 (',char(956),'m)'], '2SD',...
    ['stiffness (1/',char(956),'m)'], '2SD', 'R-squared'};
xlswrite(FileName, Header);

N = numel(varargin);
Row = 1;
formatSpec = 'A%d:W%d';
for i = 1:N
    FieldNames  = fieldnames(varargin{1,i});
    if strcmp(FieldNames{8}, 'VelocityStepParameters')
        HD = '-';
        v_i = varargin{1,i}.VelocityStepParameters.InitialVelocity;
        v_f = varargin{1,i}.VelocityStepParameters.FinalVelocity;
    else
        HD = varargin{1,i}.HoldParameters.HoldDuration;
        v_i = varargin{1,i}.HoldParameters.LoadVelocity;
        v_f = varargin{1,i}.HoldParameters.ReloadVelocity;
    end
    if isempty(varargin{1,i}.AgingLawParameters) == 0
        EventName = [inputname(i + 1), ' - Aging Law'];
        Row = Row + 1;
        DataString = {EventName, varargin{1,i}.TimeData(1,1), varargin{1,i}.LoadPointDisplacementData(1,1),...
            v_i, v_f, HD,...
            varargin{1,i}.AgingLawParameters.mu_0(1,1), varargin{1,i}.AgingLawParameters.mu_0(1,2),...
            varargin{1,i}.AgingLawParameters.a(1,1), varargin{1,i}.AgingLawParameters.a(1,2),...
            varargin{1,i}.AgingLawParameters.b1(1,1), varargin{1,i}.AgingLawParameters.b1(1,2),...
            varargin{1,i}.AgingLawParameters.b2(1,1), varargin{1,i}.AgingLawParameters.b2(1,2),...
            varargin{1,i}.AgingLawParameters.aminusb(1,1), varargin{1,i}.AgingLawParameters.aminusb(1,2),...
            varargin{1,i}.AgingLawParameters.d_c1(1,1), varargin{1,i}.AgingLawParameters.d_c1(1,2),...
            varargin{1,i}.AgingLawParameters.d_c2(1,1), varargin{1,i}.AgingLawParameters.d_c2(1,2),...
            varargin{1,i}.AgingLawParameters.stiffness(1,1), varargin{1,i}.AgingLawParameters.stiffness(1,2),...
            varargin{1,i}.AgingLawParameters.R_Squared};
        cells = sprintf(formatSpec, Row, Row);
        xlswrite(FileName, DataString, cells);
    end    
    if isempty(varargin{1,i}.SlipLawParameters) == 0
        EventName = [inputname(i + 1), ' - Slip Law'];
        Row = Row + 1;
        DataString = {EventName, varargin{1,i}.TimeData(1,1), varargin{1,i}.LoadPointDisplacementData(1,1),...
            v_i, v_f, HD,...
            varargin{1,i}.SlipLawParameters.mu_0(1,1), varargin{1,i}.SlipLawParameters.mu_0(1,2),...
            varargin{1,i}.SlipLawParameters.a(1,1), varargin{1,i}.SlipLawParameters.a(1,2),...
            varargin{1,i}.SlipLawParameters.b1(1,1), varargin{1,i}.SlipLawParameters.b1(1,2),...
            varargin{1,i}.SlipLawParameters.b2(1,1), varargin{1,i}.SlipLawParameters.b2(1,2),...
            varargin{1,i}.SlipLawParameters.aminusb(1,1), varargin{1,i}.SlipLawParameters.aminusb(1,2),...
            varargin{1,i}.SlipLawParameters.d_c1(1,1), varargin{1,i}.SlipLawParameters.d_c1(1,2),...
            varargin{1,i}.SlipLawParameters.d_c2(1,1), varargin{1,i}.SlipLawParameters.d_c2(1,2),...
            varargin{1,i}.SlipLawParameters.stiffness(1,1), varargin{1,i}.SlipLawParameters.stiffness(1,2),...
            varargin{1,i}.SlipLawParameters.R_Squared};
        cells = sprintf(formatSpec, Row, Row);
        xlswrite(FileName, DataString, cells);
    end
end
